# Supplementary material for: TLR7 Agonist-Loaded Gadolinium Oxide Nanotubes Promote Anti-Tumor Immunity by Activation of Innate and Adaptive Immune Responses
Source: MDPI journal article supplement (doi:10.3390/vaccines12040373), 2024-04-01
Supplement: s1 [file s1]

## Supporting Information

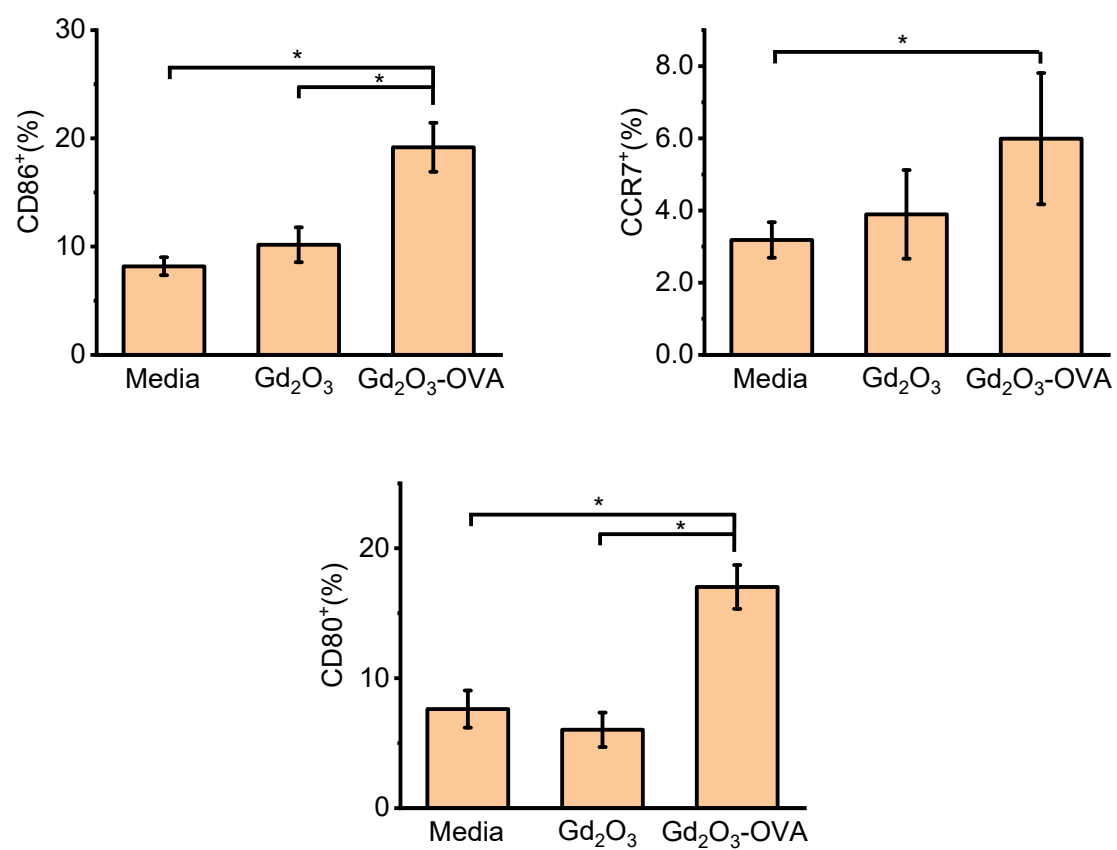

Figure S1. The effects of unloaded  $Gd_2O_3$  nanotubes and  $Gd_2O_3$ -OVA on BMDC maturation
